# Supplementary material for: Piezochromism and hydrochromism through electron transfer: new stories for viologen materials
Source: Royal Society of Chemistry journal article supplement (doi:10.1039/c6sc04579k), 2016-12-22
Supplement: c6sc04579k1.pdf [file c6sc04579k1.pdf]

## Electronic Supplementary Information (ESI)

### **Piezochromism and Hydrochromism through Electron Transfer: New Stories for Viologen Materials**

*Qi Sui, Xiang-Ting Ren, Yu-Xiang Dai, Kai Wang, Wen-Tao Li, Teng Gong, Jia-Jia Fang, Bo Zou, En-Qing Gao,\* and Lin Wang\**

|                                    |           |
|------------------------------------|-----------|
| <b>Supplementary Scheme</b> .....  | <b>S2</b> |
| <b>Supplementary Tables</b> .....  | <b>S3</b> |
| <b>Supplementary Figures</b> ..... | <b>S4</b> |

## Supplementary Scheme

Scheme S1. Synthesis of  $[H_2bpybdc]Cl_2$

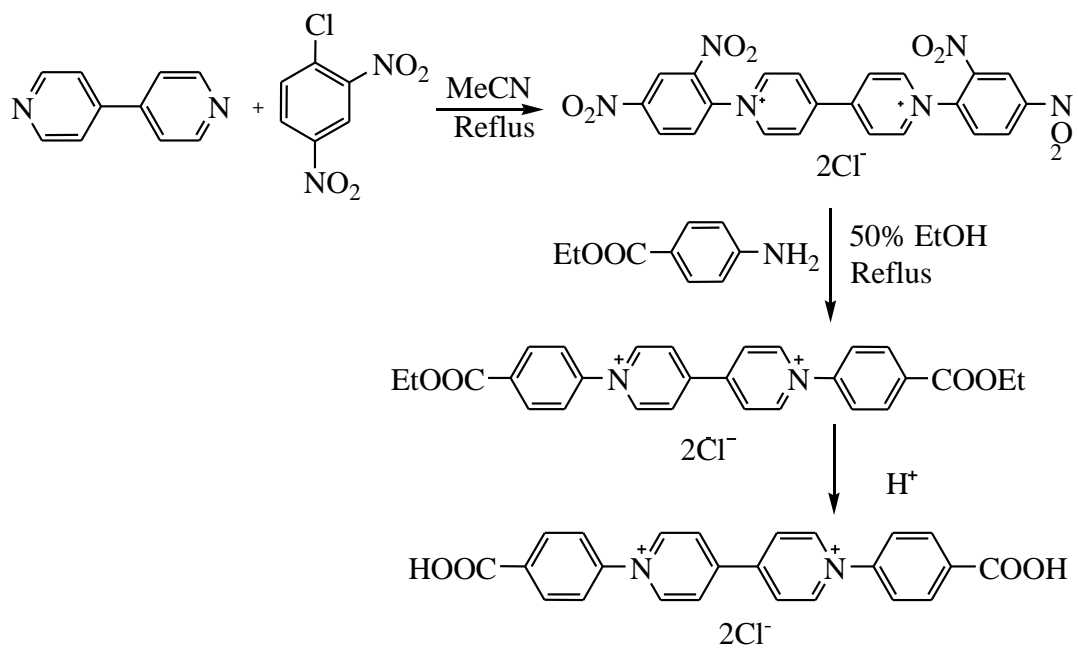

## Supplementary Tables

**Table S1.** Hydrogen bonds of **1**.

|              | D-H      | H...A   | D...A     | < (DHA) |
|--------------|----------|---------|-----------|---------|
| C8-H8A-O2    | 0.93     | 2.29    | 3.168(2)  | 158.1   |
| C9-H9A-O4    | 0.93     | 2.21    | 3.081(9)  | 154.9   |
| C9-H9A-O4'   | 0.93     | 2.30    | 3.214(9)  | 167.7   |
| C11-H11A-O4  | 0.93     | 2.50    | 3.390(9)  | 160.5   |
| C11-H11A-O4' | 0.93     | 2.52    | 3.445(8)  | 174.8   |
| O4-H4B-O1    | 0.89(2)  | 1.86(1) | 2.715(8)  | 158(3)  |
| O4'-H4B-O1   | 0.90 (2) | 1.86(1) | 2.732(7)  | 161(2)  |
| O4-H4C-O5'   | 0.87(2)  | 1.94(1) | 2.792(12) | 166(3)  |
| O4'-H4C-O5   | 0.87(2)  | 1.99(2) | 2.726(8)  | 142(2)  |
| O3-H3B-O1    | 0.90(2)  | 1.86(2) | 2.760(2)  | 178(2)  |
| O3-H3C-O2    | 0.89(3)  | 1.86(3) | 2.753 (2) | 174(2)  |
| O5-H5A-O4'   | 0.88 (2) | 1.89(3) | 2.759(14) | 169(5)  |
| O5'-H5'B-O3  | 0.86(2)  | 2.19(2) | 3.013(7)  | 159(5)  |
| O5-H5B-O3    | 0.88(2)  | 1.74(2) | 2.608(5)  | 169(5)  |

**Table S2** Lattice parameters of **1** under different external pressure.

| Pressure / GPa | <i>a</i> | <i>b</i> | <i>c</i> | $\beta$ | $V / \text{\AA}^3$ |
|----------------|----------|----------|----------|---------|--------------------|
| 0 <sup>a</sup> | 6.241    | 27.326   | 6.946    | 99.415  | 1168.6             |
| 0              | 6.243    | 27.326   | 6.935    | 99.435  | 1167.2             |
| 0.3            | 6.224    | 27.269   | 6.926    | 99.486  | 1159.5             |
| 0.81           | 6.176    | 27.225   | 6.779    | 99.353  | 1124.6             |
| 1.54           | 6.069    | 27.199   | 6.662    | 99.072  | 1086.1             |
| 2.62           | 5.967    | 27.178   | 6.518    | 98.499  | 1045.6             |
| 3.62           | 5.878    | 27.148   | 6.435    | 98.320  | 1016.1             |
| 6.19           | 5.745    | 27.087   | 6.263    | 98.104  | 964.8              |
| 8.4            | 5.693    | 27.026   | 6.208    | 98.034  | 945.7              |

<sup>a</sup> From single-crystal X-ray analysis. Others are from powder diffraction under different pressure.

## Supplementary Figures

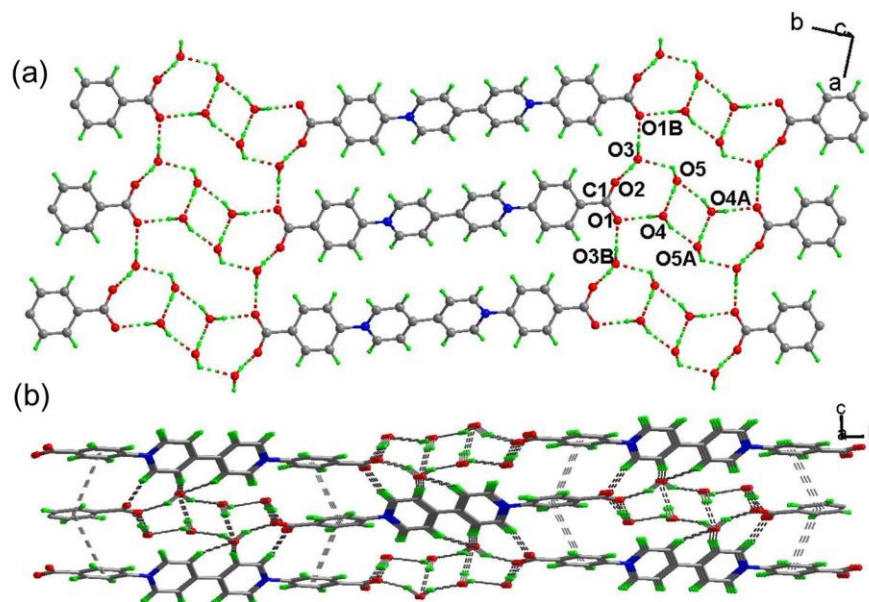

**Fig. S1** (a): 2D hydrogen-bonded layer. (b): The 3D structure of **1** via  $\pi$ - $\pi$  stacking and hydrogen-bonds. Symmetry code: A = 1-x, -y, 1-z; B = 1+x, y, z.

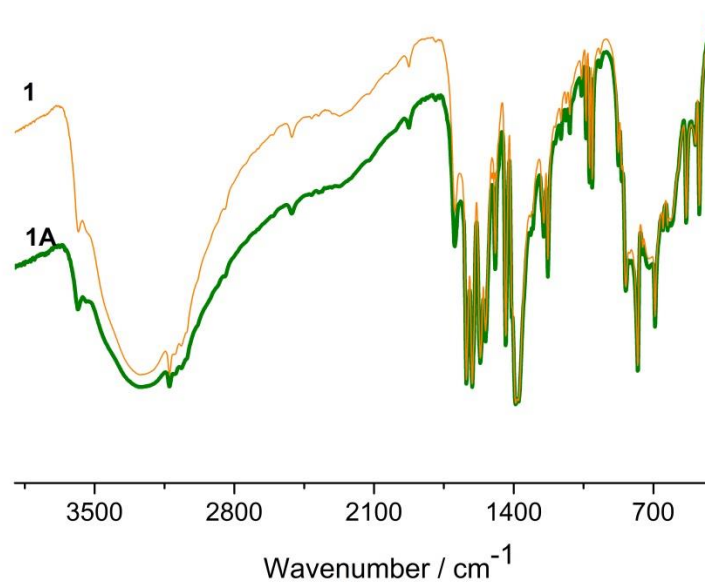

**Fig. S2** IR spectra of **1** and **1A**.

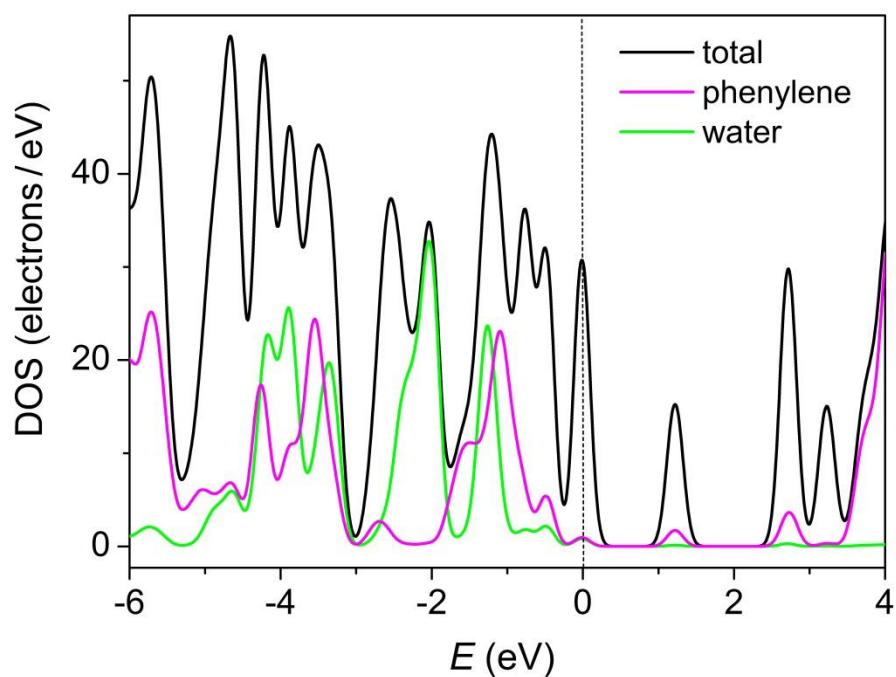

**Fig. S3** Total and partial density of states calculated from single-crystal data of **1**.

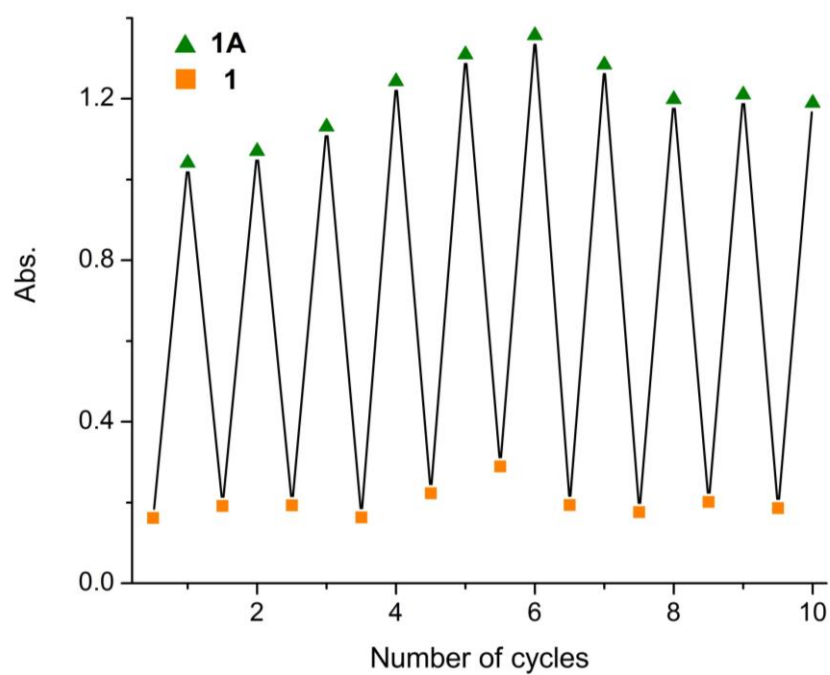

**Fig. S4** The repeated cycles of **1** and **1A** (based on absorbance at  $\lambda = 739$  nm).

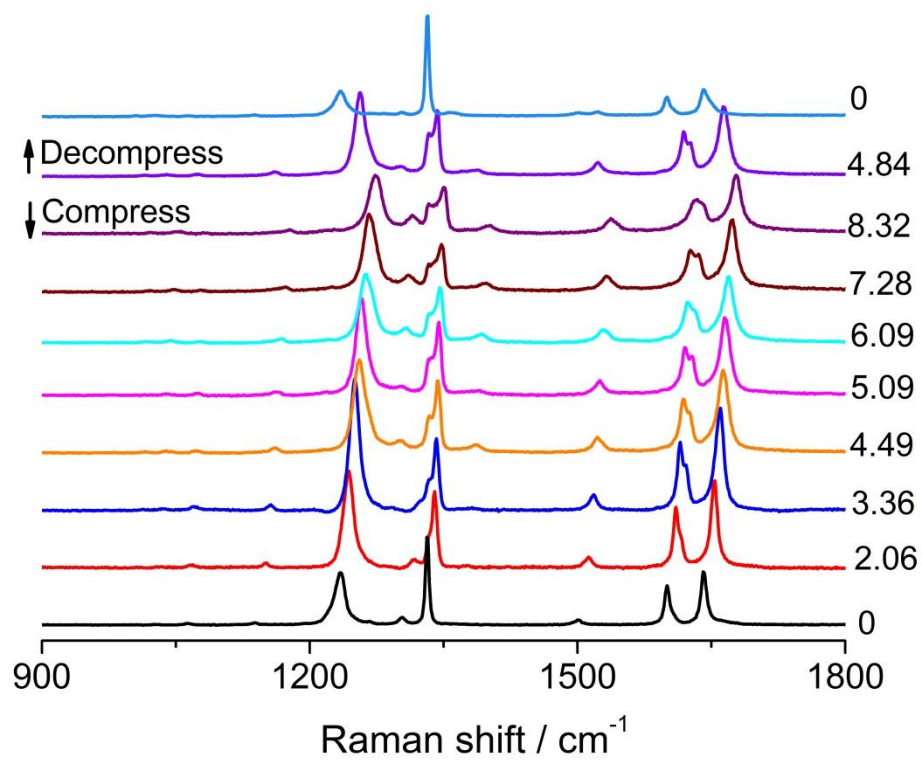

**Fig. S5** The *in-situ* Raman spectra of **1** with pressure given in GPa.

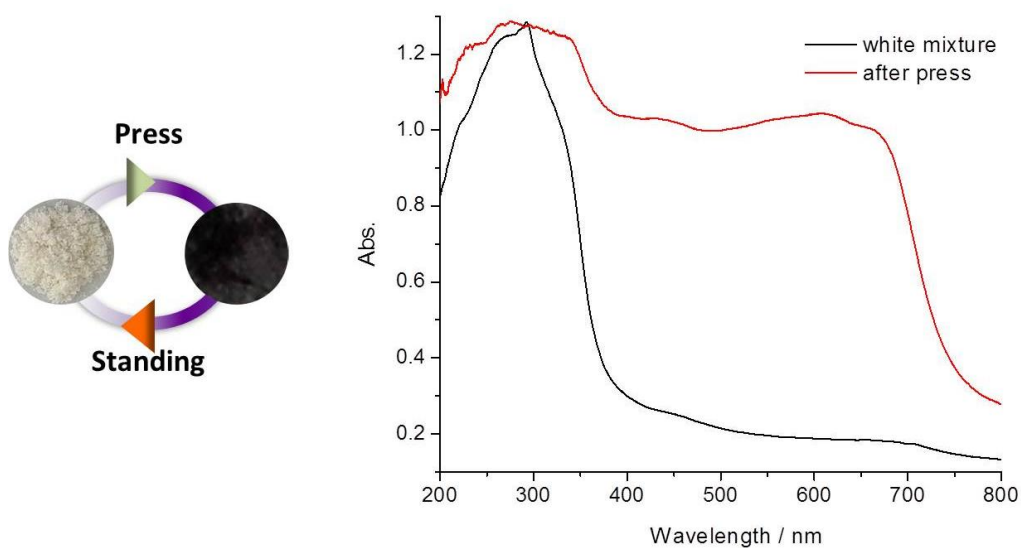

**Fig. S6** The photographs and UV-vis spectra of a mixture of  $\text{MVC}_{12}$  and benzoic acid.

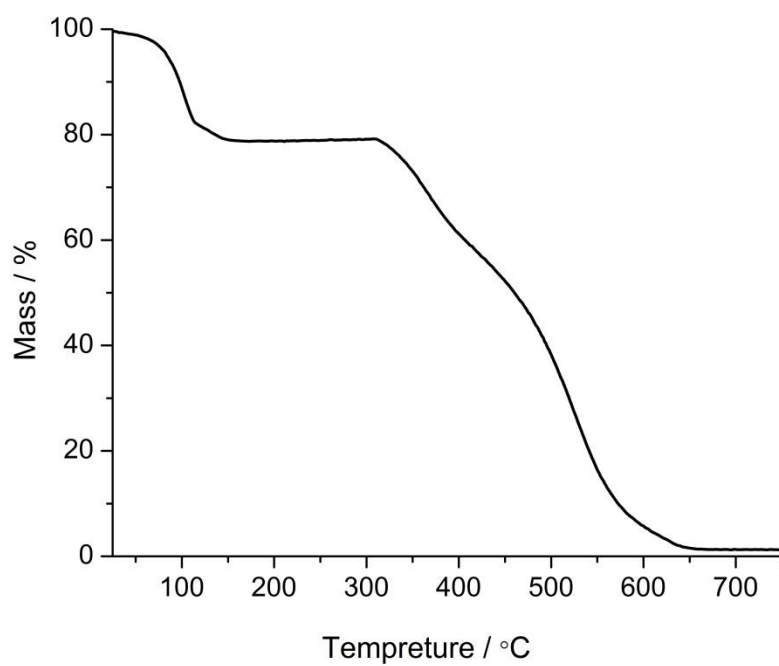

**Fig. S7** Thermogravimetric plot of **1**.

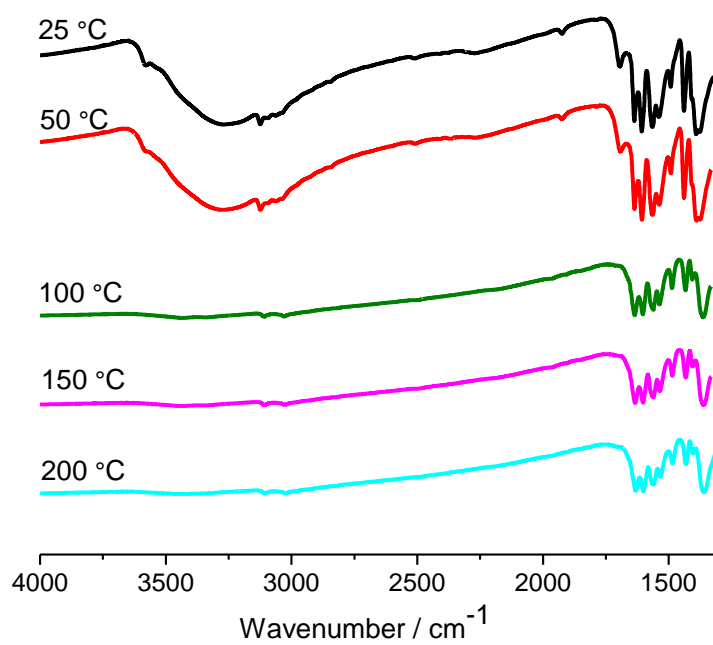

**Fig. S8** *In-situ* IR of **1** at different temperature.

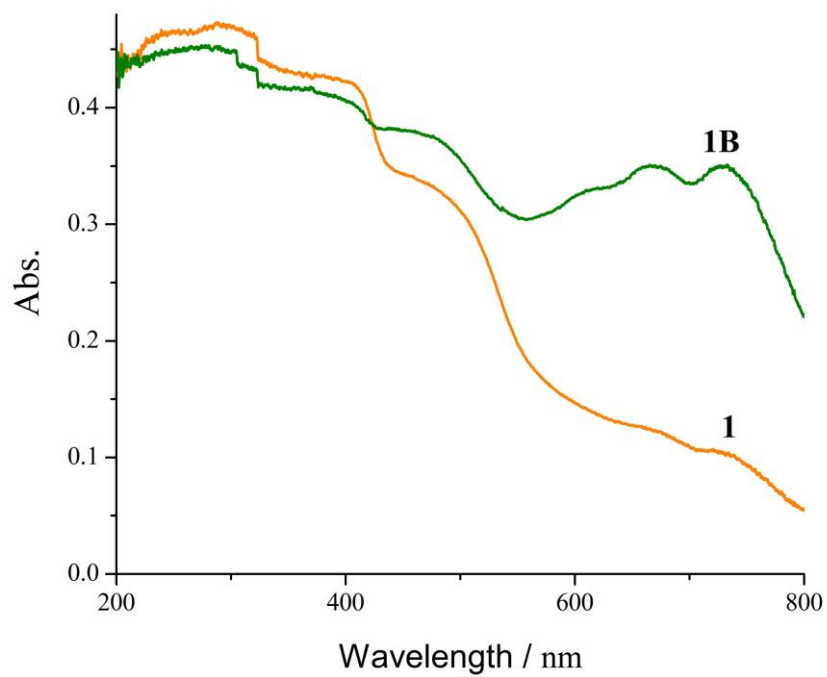

**Fig. S9** UV-vis spectra of **1** and **1B**.

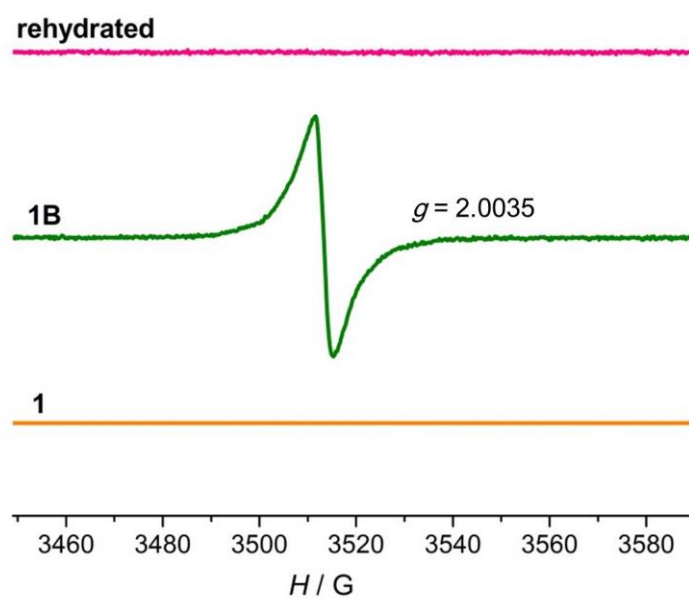

**Fig. S10** EPR spectra of **1** and **1B**.



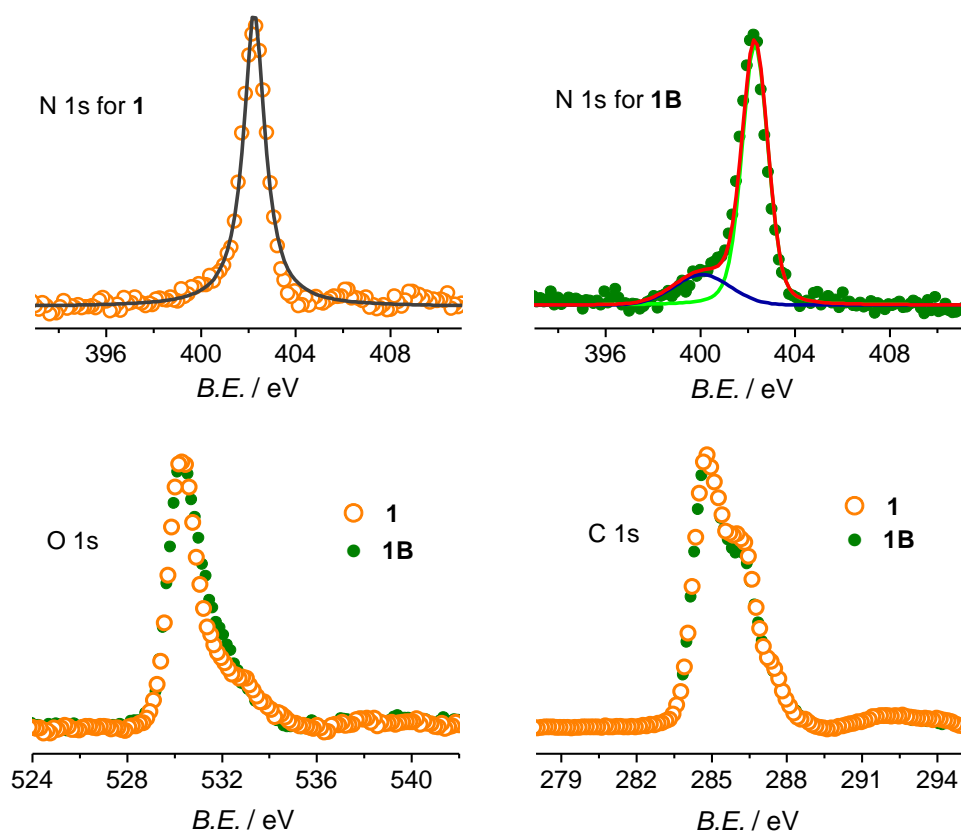

**Fig. S11** XPS spectra of **1** and **1B**. The solid lines in the N 1s spectra depict the fitted curves.

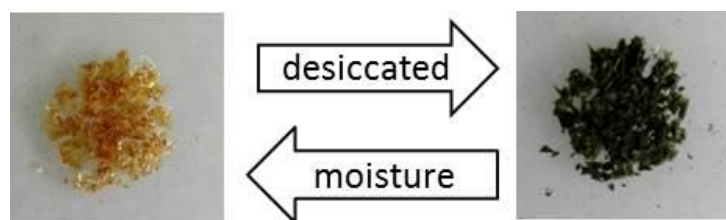

**Fig. S12** The photographs of **1** before and after placed in a desiccator.
